# Supplementary material
Source: PubMed Central journal article supplement (PMC7870292)
Supplement: NIHMS1658386-supplement-1.pdf [file NIHMS1658386-supplement-1.pdf]

**Supplementary Tables:****Supplementary Table 1:** Univariate Cox proportional hazards regression model highlighting OS in NET patient population

| Variable                            |                        | Hazard ratio | 95% Confidence Interval (CI) | p-value |
|-------------------------------------|------------------------|--------------|------------------------------|---------|
| Grade (III/IV) vs. grade (I/II)     |                        | 4.61         | 4.17 – 5.08                  | <0.001  |
| Staging                             | Regional vs. localized | 2.03         | 1.95 – 2.12                  | <0.001  |
|                                     | Distant vs. localized  | 5.55         | 5.34 – 5.78                  | <0.001  |
| Female vs. male                     |                        | 0.87         | 0.85 – 0.90                  | <0.001  |
| Uninsured vs. insured               |                        | 1.67         | 1.60 – 1.74                  | 0.132   |
| Marital status (single vs. married) |                        | 1.24         | 1.20 – 1.28                  | <0.001  |
| Rural vs. urban                     |                        | 1.22         | 1.16 – 1.28                  | <0.001  |

**Supplementary Table 2:** Univariate Cox proportional hazards regression model highlighting DSS in NET patient population

| Variable                            |                        | Hazard ratio | 95% Confidence Interval (CI) | p-value |
|-------------------------------------|------------------------|--------------|------------------------------|---------|
| Grade (III/IV) vs. grade (I/II)     |                        | 7.83         | 6.98 – 8.79                  | <0.001  |
| Staging                             | Regional vs. localized | 5.09         | 4.72 – 5.49                  | <0.001  |
|                                     | Distant vs. localized  | 20.45        | 19.14 – 21.85                | <0.001  |
| Female vs. male                     |                        | 0.87         | 0.83 – 0.91                  | <0.001  |
| Uninsured vs. insured               |                        | 1.45         | 1.14 – 1.83                  | 0.002   |
| Marital status (single vs. married) |                        | 1.05         | 1.00 – 1.09                  | 0.051   |
| Rural vs. urban                     |                        | 1.23         | 1.15 – 1.31                  | <0.001  |

**Supplementary Figures:**

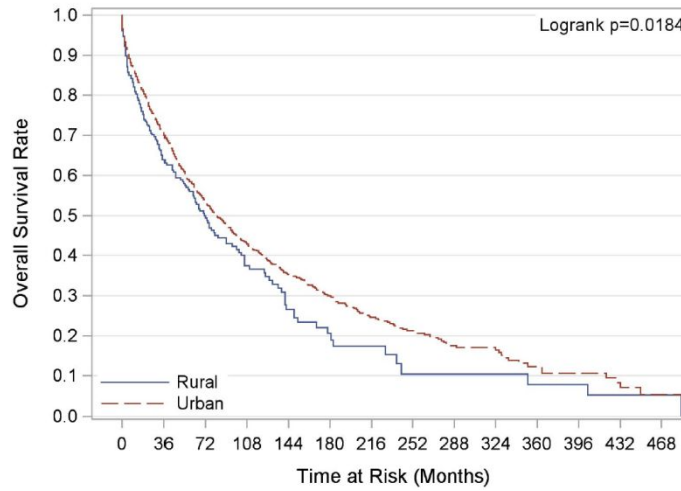

| Strata | 3-yr Surv.Rate (95% CI) | 5-yr Surv.Rate (95% CI) | Median Surv. (95% CI) |
|--------|-------------------------|-------------------------|-----------------------|
| Total  | 0.70 (0.68, 0.71)       | 0.58 (0.56, 0.60)       | 79.0 (73.0, 88.0)     |
| Rural  | 0.64 (0.58, 0.69)       | 0.56 (0.50, 0.62)       | 71.0 (58.0, 90.0)     |
| Urban  | 0.71 (0.69, 0.72)       | 0.58 (0.56, 0.60)       | 81.0 (76.0, 90.0)     |

**Supplementary figure 1:** Unadjusted Kaplan-Meier OS curve for pancreatic NET patients in rural versus urban region

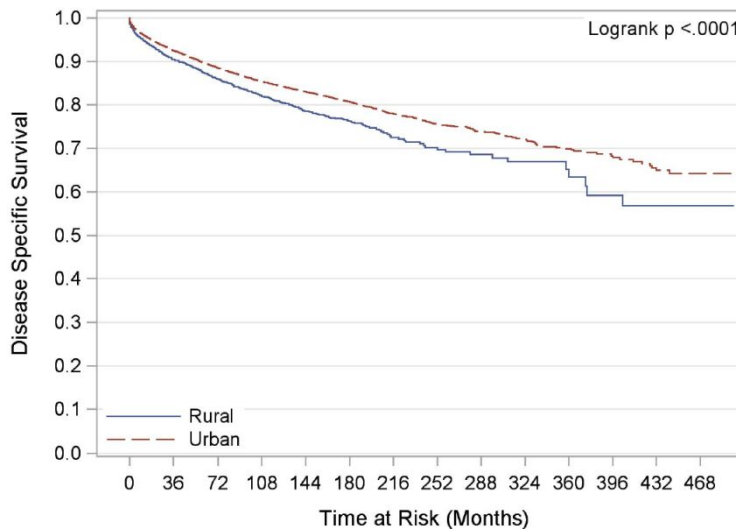

| Strata | 3-yr Surv.Rate (95% CI) | 5-yr Surv.Rate (95% CI) | Median Surv. (95% CI) |
|--------|-------------------------|-------------------------|-----------------------|
| Total  | 0.74 (0.72, 0.75)       | 0.63 (0.61, 0.65)       | 106.0 (94.0, 120.0)   |
| Rural  | 0.69 (0.64, 0.74)       | 0.62 (0.55, 0.67)       | 83.0 (70.0, 124.0)    |
| Urban  | 0.75 (0.73, 0.76)       | 0.64 (0.62, 0.66)       | 109.0 (95.0, 122.0)   |

**Supplementary figure 2:** Unadjusted Kaplan-Meier DSS curve for pancreatic NET patients in rural versus urban region

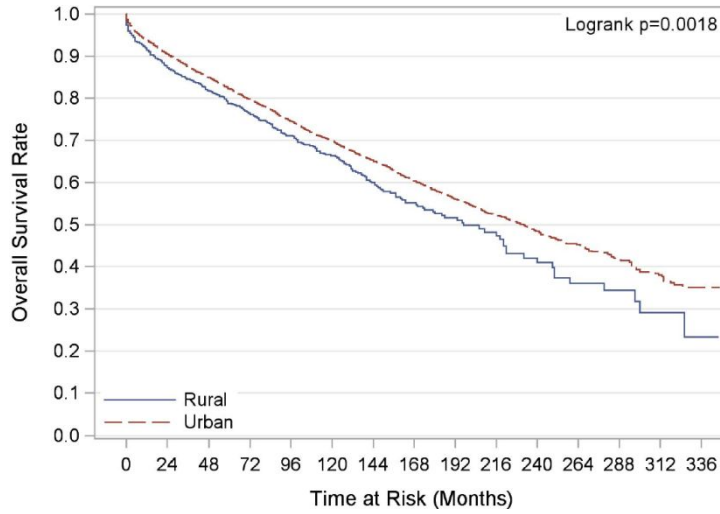

| Strata | 3-yr Surv.Rate (95% CI) | 5-yr Surv.Rate (95% CI) | Median Surv. (95% CI) |
|--------|-------------------------|-------------------------|-----------------------|
| Total  | 0.87 (0.87, 0.88)       | 0.82 (0.81, 0.83)       | 228.0 (218.0, 238.0)  |
| Rural  | 0.85 (0.82, 0.87)       | 0.79 (0.76, 0.81)       | 197.0 (170.0, 222.0)  |
| Urban  | 0.88 (0.87, 0.88)       | 0.82 (0.81, 0.83)       | 232.0 (221.0, 242.0)  |

**Supplementary figure 3:** Unadjusted Kaplan-Meier OS curve for pulmonary NET patients in rural versus urban region

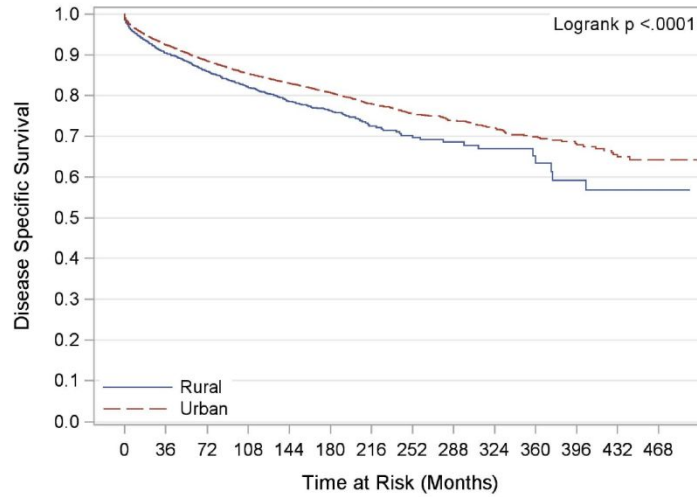

| Strata | 3-yr Surv.Rate (95% CI) | 5-yr Surv.Rate (95% CI) | Median Surv. (95% CI) |
|--------|-------------------------|-------------------------|-----------------------|
| Total  | 0.92 (0.92, 0.93)       | 0.90 (0.89, 0.90)       | NR (NR, NR)           |
| Rural  | 0.90 (0.87, 0.92)       | 0.87 (0.84, 0.89)       | NR (NR, NR)           |
| Urban  | 0.92 (0.92, 0.93)       | 0.90 (0.89, 0.91)       | NR (NR, NR)           |

**Supplementary figure 4:** Unadjusted Kaplan-Meier DSS curve for pulmonary NET patients in rural versus urban region

1  
2  
3  
4  
5  
6  
7  
8  
9  
10  
11  
12  
13  
14  
15  
16  
17  
18  
19  
20  
21  
22  
23  
24  
25  
26  
27  
28  
29  
30  
31  
32  
33  
34  
35  
36  
37  
38  
39  
40  
41  
42  
43  
44  
45  
46  
47  
48  
49  
50  
51  
52  
53  
54  
55  
56  
57  
58  
59  
60

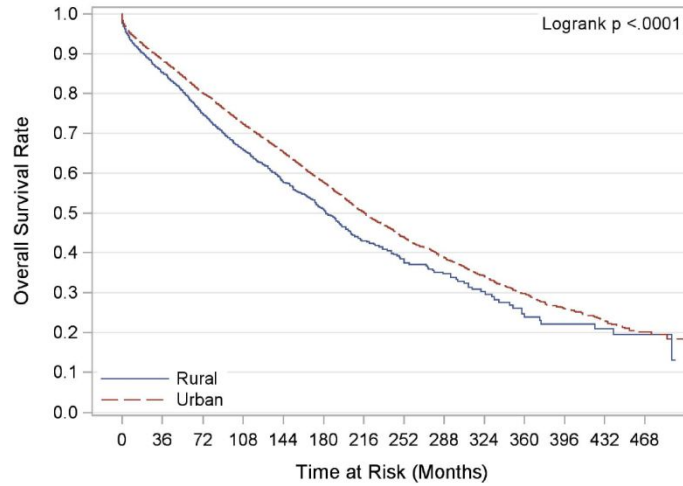

| Strata | 3-yr Surv.Rate (95% CI) | 5-yr Surv.Rate (95% CI) | Median Surv. (95% CI) |
|--------|-------------------------|-------------------------|-----------------------|
| Total  | 0.88 (0.88, 0.89)       | 0.83 (0.82, 0.83)       | 214.0 (208.0, 218.0)  |
| Rural  | 0.85 (0.84, 0.87)       | 0.79 (0.77, 0.80)       | 182.0 (173.0, 195.0)  |
| Urban  | 0.89 (0.88, 0.89)       | 0.83 (0.83, 0.84)       | 217.0 (211.0, 222.0)  |

**Supplementary figure 5:** Unadjusted Kaplan-Meier OS curve for gastrointestinal NET patients in rural versus urban region

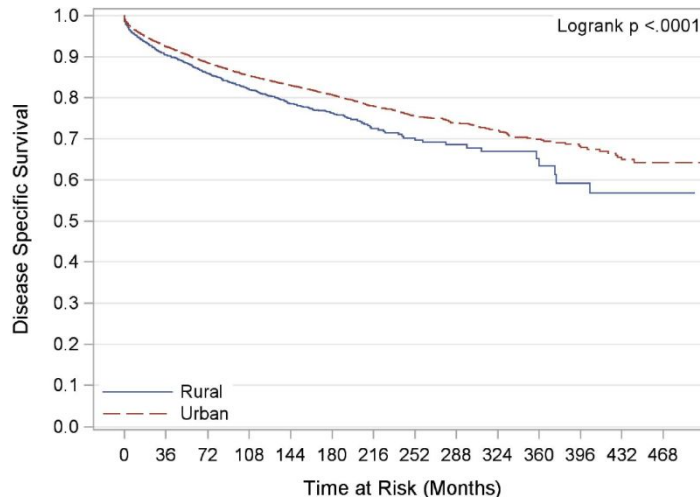

| Strata | 3-yr Surv.Rate (95% CI) | 5-yr Surv.Rate (95% CI) | Median Surv. (95% CI) |
|--------|-------------------------|-------------------------|-----------------------|
| Total  | 0.94 (0.94, 0.94)       | 0.92 (0.91, 0.92)       | NR (NR, NR)           |
| Rural  | 0.93 (0.92, 0.93)       | 0.90 (0.89, 0.91)       | NR (NR, NR)           |
| Urban  | 0.94 (0.94, 0.95)       | 0.92 (0.92, 0.92)       | NR (NR, NR)           |

**Supplementary figure 6:** Unadjusted Kaplan-Meier DSS curve for gastrointestinal NET patients in rural versus urban region
